# Supplementary material for: Influence of soil amendment of different concentrations of amino acid water-soluble fertilizer on physiological characteristics, yield and quality of “Hangjiao No.2” Chili Pepper
Source: PeerJ. 2021 Nov 29;9:e12472. doi: 10.7717/peerj.12472 (PMC8638573; doi:10.7717/peerj.12472)
Supplement: Supplemental Information 1 [file peerj-09-12472-s001.xlsx]

## Sheet: Sheet1
Variety of pepper	Treatment	ETR	Y(II)	Fv/Fm	qP	NPQ		Variety of pepper	Treatment	Root Activty		Variety of pepper	Treatment	FruitLength		Variety of pepper	Treatment	Yield of pepper		Variety of pepper	Treatment	Capsaicin		Variety of pepper	Treatment	dihydrocapsaicin			Essential	amino acids	ug/g
Hangjiao No.2	CK	21.0381	0.659222	0.673699	0.781778	0.0742222		Hangjiao No.2	CK	1743.01		Hangjiao No.2	CK	17.3333		Hangjiao No.2	CK	29501		Hangjiao No.2	CK	2.062		Hangjiao No.2	CK	0.1664			Variety of pepper	Treatment	Histidine	Isoleucine	Leucine	Methionine	Phenylalanine	Threonine	Tryptophan	Valine
Hangjiao No.2	CK	20.9803	0.677556	0.67458	0.788778	0.0914111		Hangjiao No.2	CK	1798.88		Hangjiao No.2	CK	18		Hangjiao No.2	CK	29329.3		Hangjiao No.2	CK	2.4426		Hangjiao No.2	CK	0.1596			Hangjiao No.2	CK	176.829	73.7299	42.0332	8.0644	51.0357	48.0217	18.6528	65.0114
Hangjiao No.2	CK	20.9806	0.646111	0.6725	0.827222	0.0888889		Hangjiao No.2	CK	1699.67		Hangjiao No.2	CK	16.2667		Hangjiao No.2	CK	29671.5		Hangjiao No.2	CK	1.62215		Hangjiao No.2	CK	0.1723			Hangjiao No.2	CK	175.358	76.0297	40.5332	7.8644	51.2357	47.8357	17.5628	63.552
Hangjiao No.2	T1	26.0343	0.739556	0.644667	0.893444	0.169222		Hangjiao No.2	T1	1907.9		Hangjiao No.2	T1	22.5		Hangjiao No.2	T1	34198.9		Hangjiao No.2	T1	5.70345		Hangjiao No.2	T1	1.0816			Hangjiao No.2	CK	176.887	75.3298	42.0332	7.9644	49.9357	47.9137	19.7428	65.0302
Hangjiao No.2	T1	26.1561	0.631778	0.652	0.926667	0.139222		Hangjiao No.2	T1	1839.99		Hangjiao No.2	T1	20.8333		Hangjiao No.2	T1	33338		Hangjiao No.2	T1	6.0861		Hangjiao No.2	T1	1.07755			Hangjiao No.2	T1	235.148	86.4493	53.9415	11.0455	57.1049	58.847	25.0605	82.4101
Hangjiao No.2	T1	26.5623	0.934333	0.625667	0.876444	0.142889		Hangjiao No.2	T1	1874		Hangjiao No.2	T1	20.0667		Hangjiao No.2	T1	33596.8		Hangjiao No.2	T1	5.6167		Hangjiao No.2	T1	1.0698			Hangjiao No.2	T1	234.652	85.1493	55.5414	10.9278	58.0841	57.9668	24.1207	81.9006
Hangjiao No.2	T2	24.8798	0.541	0.753	0.961	0.0925		Hangjiao No.2	T2	1889.04		Hangjiao No.2	T2	26.3333		Hangjiao No.2	T2	37921.1		Hangjiao No.2	T2	2.81355		Hangjiao No.2	T2	0.1747			Hangjiao No.2	T1	235.65	86.5493	54.7416	11.5167	56.0958	59.7569	26.0903	82.6204
Hangjiao No.2	T2	24.0044	0.523556	0.755444	0.927556	0.110556		Hangjiao No.2	T2	1902.1		Hangjiao No.2	T2	24.5		Hangjiao No.2	T2	37037.1		Hangjiao No.2	T2	2.6356		Hangjiao No.2	T2	0.19165			Hangjiao No.2	T2	189.782	80.929	49.6645	9.29911	53.9339	54.1467	19.0031	76.0523
Hangjiao No.2	T2	25.4233	0.538889	0.761	0.876222	0.0935556		Hangjiao No.2	T2	1895.19		Hangjiao No.2	T2	25.6667		Hangjiao No.2	T2	38805.1		Hangjiao No.2	T2	2.7239		Hangjiao No.2	T2	0.17745			Hangjiao No.2	T2	190.572	82.2289	49.4745	10.2991	52.9548	53.9469	20.002	78.0113
Hangjiao No.2	T3	21.7206	0.546593	0.651333	0.821741	0.353148		Hangjiao No.2	T3	2245.31		Hangjiao No.2	T3	21		Hangjiao No.2	T3	31854.5		Hangjiao No.2	T3	3.7533		Hangjiao No.2	T3	0.24535			Hangjiao No.2	T2	188.693	81.729	49.5545	8.29911	54.8131	54.0471	18.0011	77.0333
Hangjiao No.2	T3	22.6369	0.332333	0.646889	0.793556	0.267		Hangjiao No.2	T3	2125.73		Hangjiao No.2	T3	19.6667		Hangjiao No.2	T3	31674.7		Hangjiao No.2	T3	3.86825		Hangjiao No.2	T3	0.2452			Hangjiao No.2	T3	150.9	61.056	34.0306	5.30307	41.967	38.6246	14.4024	54.6038
Hangjiao No.2	T3	21.6926	0.539778	0.655222	0.829963	0.268444		Hangjiao No.2	T3	2185.52		Hangjiao No.2	T3	20		Hangjiao No.2	T3	32012.1		Hangjiao No.2	T3	3.6417		Hangjiao No.2	T3	0.25545			Hangjiao No.2	T3	152.477	62.0449	33.8306	4.52425	41.489	42.0113	13.3005	53.8042
																													Hangjiao No.2	T3	151.689	60.067	33.9306	5.21115	40.978	40.3179	15.2014	55.404
	fruit diameter
Hangjiao No.2	CK	20.215				Fresh weight				Dry weight				Soluble Sugar				Soluble protein				Chlorophyll A	Chlorophyll B	Chlorophyll AB	caroteniod				Non-ssential	amino acids
Hangjiao No.2	CK	19.325		Hangjiao No.2	CK	42.7		Hangjiao No.2	CK	2.25		Hangjiao No.2	CK	7.32552		Hangjiao No.2	CK	0.919409		Hangjiao No.2	CK	0.730706	0.412116	1.14282	0.317689				Variety of pepper	Treatment	Alanine	arginine	Asparagine	Aspartic acid	Cysteine	Glutamine	Glycine	Proline	Serine	Tyrosine
Hangjiao No.2	CK	19.94		Hangjiao No.2	CK	43.7		Hangjiao No.2	CK	2.63		Hangjiao No.2	CK	5.91328		Hangjiao No.2	CK	0.911091		Hangjiao No.2	CK	0.630643	0.236108	0.866751	0.217671				Hangjiao No.2	CK	369.768	150.164	42.7107	1104.97	11.7709	81.0854	12.2661	134.369	164.891	153.125
Hangjiao No.2	CK	19.055		Hangjiao No.2	CK	42.07		Hangjiao No.2	CK	1.93		Hangjiao No.2	CK	6.82299		Hangjiao No.2	CK	0.924273		Hangjiao No.2	CK	0.929168	0.218606	1.14777	0.416132				Hangjiao No.2	CK	368.946	149.764	41.9209	1103.77	11.8688	78.9062	12.7681	135.257	163.702	152.73
Hangjiao No.2	CK	19.51		Hangjiao No.2	CK	43.02		Hangjiao No.2	CK	2.5		Hangjiao No.2	CK	6.42284		Hangjiao No.2	CK	0.936795		Hangjiao No.2	CK	0.629456	0.233791	0.863247	0.321438				Hangjiao No.2	CK	370.827	149.963	43.8125	1105.87	10.47	80.9958	11.7716	133.479	165.48	152.922
Hangjiao No.2	CK	19.205		Hangjiao No.2	CK	43.13		Hangjiao No.2	CK	2.94		Hangjiao No.2	CK	6.60269		Hangjiao No.2	CK	0.918364		Hangjiao No.2	CK	0.72956	0.415164	1.14472	0.321169				Hangjiao No.2	T1	450.425	191.823	72.4765	1607.1	16.9124	116.512	19.6308	208.301	234.022	209.74
Hangjiao No.2	T1	24.035		Hangjiao No.2	T1	49.16		Hangjiao No.2	T1	4.15		Hangjiao No.2	T1	7.41925		Hangjiao No.2	T1	4.56568		Hangjiao No.2	T1	1.34974	0.670592	2.02033	0.715724				Hangjiao No.2	T1	455.536	192.123	71.9965	1603.11	17.0324	117.511	19.6246	206.703	233.106	205.941
Hangjiao No.2	T1	24.465		Hangjiao No.2	T1	48.28		Hangjiao No.2	T1	4.31		Hangjiao No.2	T1	5.61896		Hangjiao No.2	T1	4.6617		Hangjiao No.2	T1	1.44887	0.668393	2.11726	0.627004				Hangjiao No.2	T1	445.314	190.923	72.9565	1605.1	15.9524	118.512	18.1277	207.802	232.064	204.84
Hangjiao No.2	T1	24.81		Hangjiao No.2	T1	47.36		Hangjiao No.2	T1	4.92		Hangjiao No.2	T1	6.81934		Hangjiao No.2	T1	4.46432		Hangjiao No.2	T1	1.34816	0.688399	2.03656	0.628337				Hangjiao No.2	T2	415.858	156.678	48.4133	1233.82	13.8176	85.66	14.9767	174.113	189.241	185.017
Hangjiao No.2	T1	24.675		Hangjiao No.2	T1	47.38		Hangjiao No.2	T1	3.97		Hangjiao No.2	T1	6.41879		Hangjiao No.2	T1	4.55216		Hangjiao No.2	T1	1.25022	0.727805	1.97802	0.534735				Hangjiao No.2	T2	414.839	150.58	46.2154	1238.22	13.2555	83.66	13.5166	173.352	191.13	184.723
Hangjiao No.2	T1	24.059		Hangjiao No.2	T1	48.32		Hangjiao No.2	T1	6.22		Hangjiao No.2	T1	6.81858		Hangjiao No.2	T1	4.57398		Hangjiao No.2	T1	1.34922	0.590329	1.93955	0.626555				Hangjiao No.2	T2	415.947	153.626	47.3113	1236.02	12.8197	84.66	14.9968	172.504	188.685	184.82
Hangjiao No.2	T1	24.995		Hangjiao No.2	T2	45.7		Hangjiao No.2	T2	3.78		Hangjiao No.2	T2	7.66313		Hangjiao No.2	T2	2.3925		Hangjiao No.2	T2	0.617406	0.241611	0.859017	0.137427				Hangjiao No.2	T3	281.093	120.906	39.8825	950.29	7.70398	64.1275	8.7269	100.031	146.463	142.6
Hangjiao No.2	T2	20.915		Hangjiao No.2	T2	45.13		Hangjiao No.2	T2	3.49		Hangjiao No.2	T2	7.77313		Hangjiao No.2	T2	2.40682		Hangjiao No.2	T2	0.817621	0.221898	1.03852	0.300723				Hangjiao No.2	T3	282.071	118.866	39.8227	951.71	7.6051	62.9305	7.9488	102.031	145.723	140.541
Hangjiao No.2	T2	21.12		Hangjiao No.2	T2	44.47		Hangjiao No.2	T2	3.52		Hangjiao No.2	T2	7.56672		Hangjiao No.2	T2	2.38818		Hangjiao No.2	T2	0.717743	0.231648	0.950391	0.217615				Hangjiao No.2	T3	280.083	119.885	39.8523	951.72	7.50287	63.5245	9.52794	98.0311	146.843	141.571
Hangjiao No.2	T2	21.22		Hangjiao No.2	T2	45.3		Hangjiao No.2	T2	3.73		Hangjiao No.2	T2	7.86388		Hangjiao No.2	T2	2.39364		Hangjiao No.2	T2	0.717274	0.232257	0.947531	0.216944
Hangjiao No.2	T2	20.88		Hangjiao No.2	T2	45.01		Hangjiao No.2	T2	3.72		Hangjiao No.2	T2	7.47164		Hangjiao No.2	T2	2.38011		Hangjiao No.2	T2	0.716743	0.232366	0.952109	0.221507
Hangjiao No.2	T2	20.78		Hangjiao No.2	T3	41.71		Hangjiao No.2	T3	2.98		Hangjiao No.2	T3	9.4394		Hangjiao No.2	T3	1.22364		Hangjiao No.2	T3	0.668648	0.490094	1.15874	0.420769
Hangjiao No.2	T2	21.695		Hangjiao No.2	T3	39.98		Hangjiao No.2	T3	3.98		Hangjiao No.2	T3	9.0591		Hangjiao No.2	T3	1.12505		Hangjiao No.2	T3	0.862176	0.430612	1.29279	0.419349
Hangjiao No.2	T3	18.445		Hangjiao No.2	T3	42.36		Hangjiao No.2	T3	3.6		Hangjiao No.2	T3	9.01791		Hangjiao No.2	T3	1.32325		Hangjiao No.2	T3	0.764329	0.459219	1.22355	0.321558
Hangjiao No.2	T3	18.57		Hangjiao No.2	T3	41.32		Hangjiao No.2	T3	3.72		Hangjiao No.2	T3	8.94537		Hangjiao No.2	T3	1.23102		Hangjiao No.2	T3	0.699166	0.460556	1.15972	0.518321
Hangjiao No.2	T3	17.91		Hangjiao No.2	T3	40.72		Hangjiao No.2	T3	3.56		Hangjiao No.2	T3	8.65463		Hangjiao No.2	T3	1.215		Hangjiao No.2	T3	0.820087	0.460292	1.28038	0.419479
Hangjiao No.2	T3	18.3
Hangjiao No.2	T3	18.09
Hangjiao No.2	T3	17.975
		F.firmness				Vitamin C
Hangjiao No.2	CK	1.4		Hangjiao No.2	CK	0.977812
Hangjiao No.2	CK	1.39		Hangjiao No.2	CK	1.79625
Hangjiao No.2	CK	1.43		Hangjiao No.2	CK	1.56219
Hangjiao No.2	CK	1.39		Hangjiao No.2	CK	1.58563
Hangjiao No.2	CK	1.4		Hangjiao No.2	CK	1.57531
Hangjiao No.2	CK	1.4		Hangjiao No.2	CK	1.58406
Hangjiao No.2	CK	1.38		Hangjiao No.2	CK	1.56844
Hangjiao No.2	CK	2.2		Hangjiao No.2	CK	1.55062
Hangjiao No.2	CK	2.43		Hangjiao No.2	CK	1.98438
Hangjiao No.2	T1	5.34		Hangjiao No.2	T1	5.74156
Hangjiao No.2	T1	4.89		Hangjiao No.2	T1	6.16469
Hangjiao No.2	T1	5.28		Hangjiao No.2	T1	5.63687
Hangjiao No.2	T1	5.33		Hangjiao No.2	T1	5.64406
Hangjiao No.2	T1	5.29		Hangjiao No.2	T1	5.78468
Hangjiao No.2	T1	5.58		Hangjiao No.2	T1	4.92604
Hangjiao No.2	T1	5.29		Hangjiao No.2	T1	6.07969
Hangjiao No.2	T1	5.38		Hangjiao No.2	T1	5.68406
Hangjiao No.2	T1	5.33		Hangjiao No.2	T1	5.72875
Hangjiao No.2	T2	2.85		Hangjiao No.2	T2	2.64875
Hangjiao No.2	T2	3		Hangjiao No.2	T2	2.52906
Hangjiao No.2	T2	3		Hangjiao No.2	T2	2.74406
Hangjiao No.2	T2	2.7		Hangjiao No.2	T2	2.6175
Hangjiao No.2	T2	3		Hangjiao No.2	T2	2.61281
Hangjiao No.2	T2	3.2		Hangjiao No.2	T2	2.61094
Hangjiao No.2	T2	3.03		Hangjiao No.2	T2	2.64562
Hangjiao No.2	T2	2.82		Hangjiao No.2	T2	2.61469
Hangjiao No.2	T2	2.69		Hangjiao No.2	T2	2.63875
Hangjiao No.2	T3	3.35		Hangjiao No.2	T3	2.62094
Hangjiao No.2	T3	3.18		Hangjiao No.2	T3	2.61063
Hangjiao No.2	T3	3.17		Hangjiao No.2	T3	2.72031
Hangjiao No.2	T3	3.15		Hangjiao No.2	T3	2.63781
Hangjiao No.2	T3	3.19		Hangjiao No.2	T3	2.53344
Hangjiao No.2	T3	3.11		Hangjiao No.2	T3	2.64061
Hangjiao No.2	T3	3.29		Hangjiao No.2	T3	3.02064
Hangjiao No.2	T3	3.21		Hangjiao No.2	T3	2.8242
Hangjiao No.2	T3	3.65		Hangjiao No.2	T3	1.83955
